# Supplementary material for: Viral Load as a Factor Affecting the Fatality of Patients Suffering from Severe Fever with Thrombocytopenia Syndrome
Source: MDPI journal article supplement (doi:10.3390/v14050881), 2022-04-23
Supplement: s1 [file s1]

Supplementary Table S1. Oligonucleotide primers and probes for SFTSV-specific real-time PCR.

| <b>Virus</b> | <b>Primer Name</b> | <b>Primer Sequence (5'→3')</b> | <b>PCR Product (bp)</b> | <b>Reference</b>      |
|--------------|--------------------|--------------------------------|-------------------------|-----------------------|
| <b>SFTSV</b> | SFTS-SQ-F          | ACCTCTTTGACCCTGAGTTWGACA       | 120                     | Zhang et al.,<br>2012 |
|              | SFTS-SQ-R          | CTGAAGGAGACAGGTGGAGATGA        |                         |                       |
|              | SFTS-SQ-P          | FAM-TGCCTTGACGATCTTA-NFQ-MGB   |                         |                       |
